# Supplementary material for: Breast carcinomas associated with microglandular adenosis are linked to germline alterations in homologous recombination-deficiency genes
Source: Research Square preprint supplement (doi:10.21203/rs.3.rs-6680831/v1), 2025-06-11
Supplement: Supplementary file 1 [file e5f1ee2d573da5e74e6b9f57.docx]

| **Table 1: Clinicopathologic characteristics and germline genetic alterations of study cohort** | |
| --- | --- |
|  |  |
| **Median age at diagnosis (range)** | 46 (26-77) |
| **Clinical presentation** |  |
| Palpable mass | 13/38 (34%) |
| Mammographically-detected mass/asymmetry | 13/38 (34%) |
| Mammographically-detected calcifications | 3/38 (8%) |
| MRI-detected | 9/38 (24%) |
| **Personal breast cancer history** | 9/38 (24%) |
| **Personal non-breast cancer history** | 7/38 (18%) |
| **Family breast cancer history** | 24/38 (63%) |
| **Family breast cancer history (1st degree relative)** | 14/38 (37%) |
| **Germline pathogenic/likely pathogenic variant** | 16/38 (42%) |
| *BRCA1* | 13/16 (81%) |
| *BRCA2* | 2/16 (13%) |
| *PALB2* | 1/16 (6%) |
| **Type** |  |
| IBC-MGA | 34/38 (89%) |
| BCis-MGA | 4/38 (11%) |
| **Median invasive tumor size, mm (range)** † | 15 (2-55) |
| **Histologic type** |  |
| IDC-NST | 20/34 (59%) |
| Matrix-producing metaplastic carcinoma | 11/34 (32%) |
| Ductal with acinic cell morphology | 2/34 (6%) |
| Spindle cell metaplastic carcinoma | 1/34 (3%) |
| **Nottingham grade*** |  |
| 1-2 | 6/34 (18%) |
| 3 | 28/34 (82%) |
| **LVI identified** | 7/38 (18%) |
| **Lymph node metastasis** | 7/33 (21%) |
| **Tumor-infiltrating lymphocytes (%)** |  |
| < 50 | 29/34 (85%) |
| >= 50 | 5/34 (15%) |
| **Neoadjuvant chemotherapy** | 11/34 (32%) |
| **Pathologic complete response** | 2/11 (18%) |
| **Surgical treatment** |  |
| Breast conservation | 17/38(45%) |
| Mastectomy | 21/38 (55%) |
| **IBC-MGA with clinical follow up** | 31/34 (91%) |
| **Median follow-up in months (range)** | 64 (35-238) |
| **Adjuvant radiotherapy** | 21/31 (68%) |
| **Adjuvant chemotherapy** | 24/31 (77%) |
| **Local recurrence** | 1/31 (3%) |
| **Distant metastasis** | 5/31 (16%) |
|  |  |
|  |  |
|  |  |
|  |  |
|  |  |
|  |  |
|  |  |

† Untreated tumor size

* Pre-treatment histologic grade

∞ One patient’s death was attributed to widely metastatic ductal carcinoma of no special type arising in the contralateral breast

Abbreviations: IBC-MGA, invasive breast carcinoma associated with microglandular adenosis; BCis-MGA, breast carcinoma (in situ) associated with microglandular adenosis; IDC-NST, invasive ductal carcinoma of no special type; LVI, lymphovascular space invasion
